# Supplementary material
Source: publisher figshare collection journal article supplement (https://acs.figshare.com/ndownloader/files/13052129)
Supplement: Supplementary file 1 [file 13052129]

## **Supporting Information for Publication**

### **Effective Design of a PVSA Process to Recover Dilute Helium from a Natural Gas Source in a Methane-Rich Mixture with Nitrogen**

**Parisa Eghbal Jahromi, Shohreh Fatemi\*<sup>1</sup>, Ali Vatani**

School of Chemical Engineering, College of Engineering, University of Tehran, P.O. Box 11365-4563,  
Tehran, Iran

---

<sup>1</sup> shfatemi@ut.ac.ir

**S1:** The parameters in the DPL model of equations 4~6 are as summarized in **Table S1-a** and the parameters of Toth model are as in **Table S1-b**.

Table S1-Model parameters obtained from fitting the experimental equilibrium adsorption data for CH<sub>4</sub> and N<sub>2</sub> on zeolite 13X. S1-a- DPL Model, and S1-b-Toth Model

| <b>a- DPL Model Parameter</b>  | <b>N<sub>2</sub></b> | <b>CH<sub>4</sub></b> |
|--------------------------------|----------------------|-----------------------|
| $B_{1,i} (K)$                  | 3770.8               | 4826.2                |
| $B_{2,i} (K)$                  | 1254.9               | 599.5                 |
| $b_{1,i}^0 (KPa^{-1})$         | 4.03e-09             | 2.60e-10              |
| $b_{2,i}^0 (KPa^{-1})$         | 1.29e-05             | 1.35e-4               |
| $q_{1,i}^s (mol/kg)$           | 1.30                 | 1.83                  |
| $q_{2,i}^s (mol/kg)$           | 2.09                 | 2.54                  |
| <b>b- Toth Model Parameter</b> |                      |                       |
| $\Delta H_i (KJ/mol)$          | 17.38                | 19.82                 |
| $b_i^0 (KPa^{-1})$             | 9.29e-7              | 5.82e-7               |
| $q_i^s (mol/kg)$               | 3.26                 | 4.12                  |
| $t_i$                          | 1.035                | 1.31                  |

**S2-** Initial and boundary conditions for solving the PSA mathematical model at each process step are as below:

**Table S2-** Initial and boundary conditions used for solving the governing model equations for PSA cyclic model

| Initial Conditions                                                         |                                                                      |                                                                     |                                                                     |                                                                |                                                                                              |                                                                                                    |
|----------------------------------------------------------------------------|----------------------------------------------------------------------|---------------------------------------------------------------------|---------------------------------------------------------------------|----------------------------------------------------------------|----------------------------------------------------------------------------------------------|----------------------------------------------------------------------------------------------------|
| @t=0                                                                       |                                                                      |                                                                     |                                                                     |                                                                |                                                                                              |                                                                                                    |
| $y_i=y_{feed} \text{ \& } q_i=0$                                           |                                                                      | $P=P_{Feed}$                                                        |                                                                     | $T_g=T_p=T'$                                                   |                                                                                              |                                                                                                    |
| Boundary Conditions                                                        |                                                                      |                                                                     |                                                                     |                                                                |                                                                                              |                                                                                                    |
| Feed                                                                       | EqD                                                                  | BD                                                                  | Vac.                                                                | EqU                                                            | FP                                                                                           | PP                                                                                                 |
| @z=0:<br>$u_gC_g$<br>$=u_{feed}C_{feed}$<br>$T_g=T_{feed}$<br>$P=P_{feed}$ | @z=0 :<br>$u=0$<br>@z=L:<br>$P=from$<br>$CV$<br>$Equation$<br>$(14)$ | @z=0:<br>$P=from$<br>$CV$<br>$Equation$<br>$(14)$<br>@z=L:<br>$u=0$ | @z=0:<br>$P=from$<br>$CV$<br>$Equation$<br>$(14)$<br>@z=L:<br>$u=0$ | @z=0:<br>$u=0$<br>@z=L:<br>$P=from CV$<br>$Equation$<br>$(14)$ | @z=0:<br>$u_gC_g$<br>$=u_{feed}C_{feed}$<br>$T_g=T_{feed}$<br>$P=from CV$<br>$Equation (14)$ | @z=0:<br>$u_gC_g$<br>$=u_{product}C_{product}$<br>$T_g=T_{feed}$<br>$P=from CV$<br>$Equation (14)$ |

### S3-Derivation of Equation for Estimation of valve Coefficient (C<sub>v</sub>):

The derivation of the expression used to estimate the linear valve constant C<sub>v</sub> from the bed conditions and stage time starts with ideal gas equation:

$$P_B V_B = nRT_B$$

S3-1

where:

$P_B$ = Pressure of the bed

$V_B$ = Effective volume of the bed

$n$ = Number of moles of material in the bed

$R$ = Gas constant

$T_B$ = Bed temperature

The rate of change of pressure is related to the rate of change of material holdup (assuming constant temperature and volume):

$$\frac{\partial P}{\partial n} = \frac{RT_B}{V_B} \quad \text{S3-2}$$

The flowrate through a valve can be expressed as a linear function of the pressure drop across the valve:

$$F = C_V \Delta P = C_V (P_B - P_{Downstream}) \quad \text{S3-3}$$

Where:

$F$  = Flowrate through the valve

$C_V$  = Linear valve constant

$P_{Downstream}$  = Pressure downstream of the valve.

This expression can be re-expressed as the molar flux:

$$\frac{\partial n}{\partial t} = C_V (P_B - P_{Downstream}) \quad \text{S3-4}$$

Assuming a constant downstream pressure from the valve, the rate of change of pressure in the bed can be found from the following expression:

$$\frac{\partial P_B}{\partial t} = \frac{\partial P_B}{\partial n} \times \frac{\partial n}{\partial t} = \frac{RT_B}{V_B} C_V (P_B - P_{Downstream}) \quad \text{S3-5}$$

This expression can then be integrated between the bed's start and end pressure for a given stage length and constant downstream pressure:

$$\frac{RT_B C_V}{V_B} dt = \int_{P_{Bstart}}^{P_{Bend}} \frac{1}{P_B - P_{Downstream}} dP_B \quad \text{S3-6}$$

Giving:

$$\frac{RT_B C_V}{V_B} stag\_Time = \ln(P_B - P_{downstream}) \Big|_{P_{Bstart}}^{P_{Bend}} = \ln\left(\frac{P_{Bstart} - P_{downstream}}{P_{Bend} - P_{downstream}}\right) \quad \text{S3-7}$$

By rearranging the above expression, the estimate of the constant valve  $C_V$  is given by:

$$C_V = \frac{V_B}{RT_B stag\_time} = \ln\left(\frac{P_{Bstart} - P_{downstream}}{P_{Bend} - P_{downstream}}\right) \quad \text{S3-8}$$
